# Supplementary material for: Nuclear translocation of Atox1 potentiates activin A-induced cell migration and colony formation in colon cancer
Source: PubMed Central journal article supplement (PMC6974162; doi:10.1371/journal.pone.0227916), 2020-01-21
Supplement: pone.0227916.s004.pdf [file pone.0227916.s004.pdf]

Figure 2

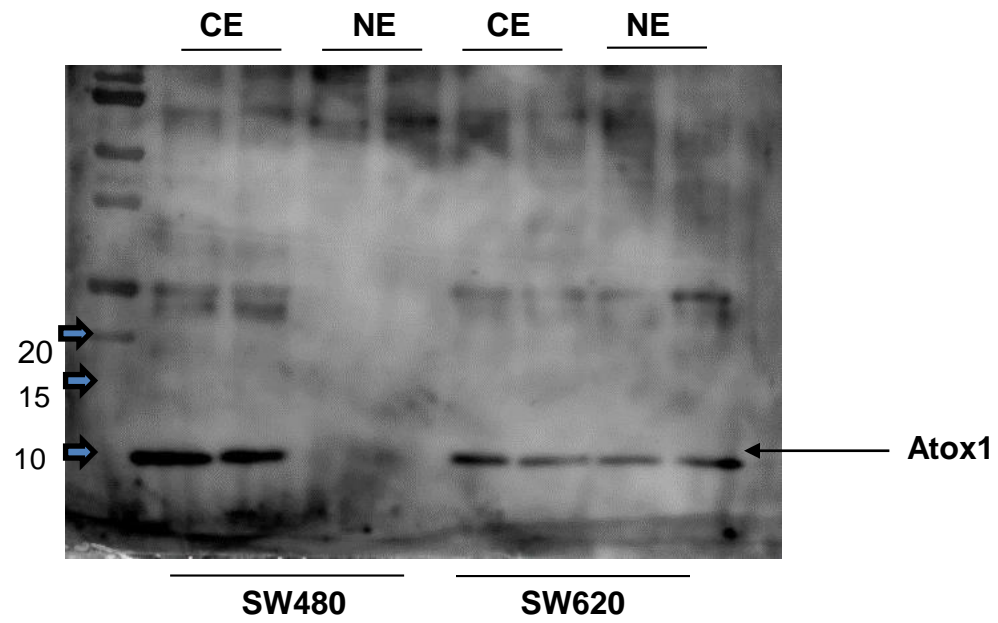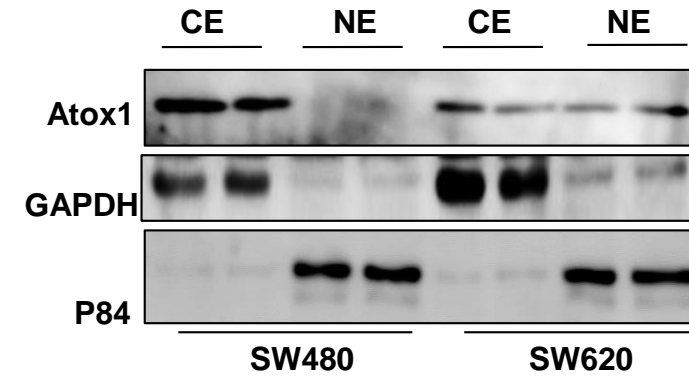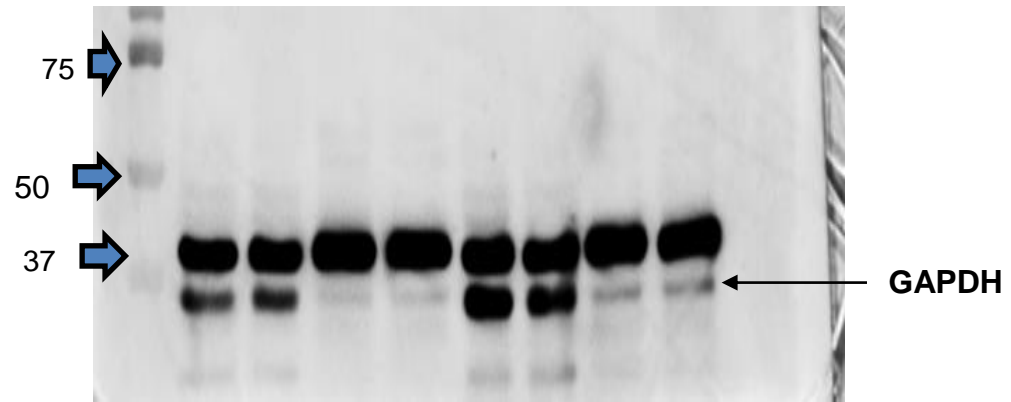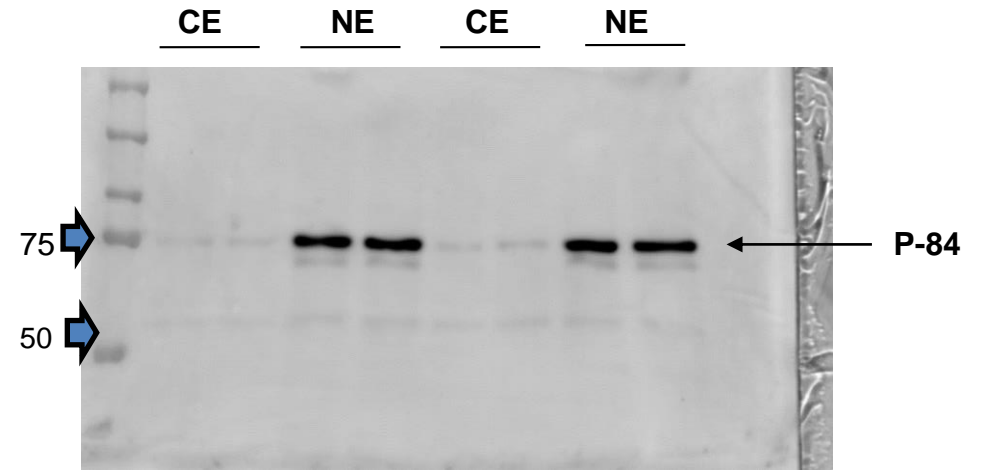

Figure 3B, SW620

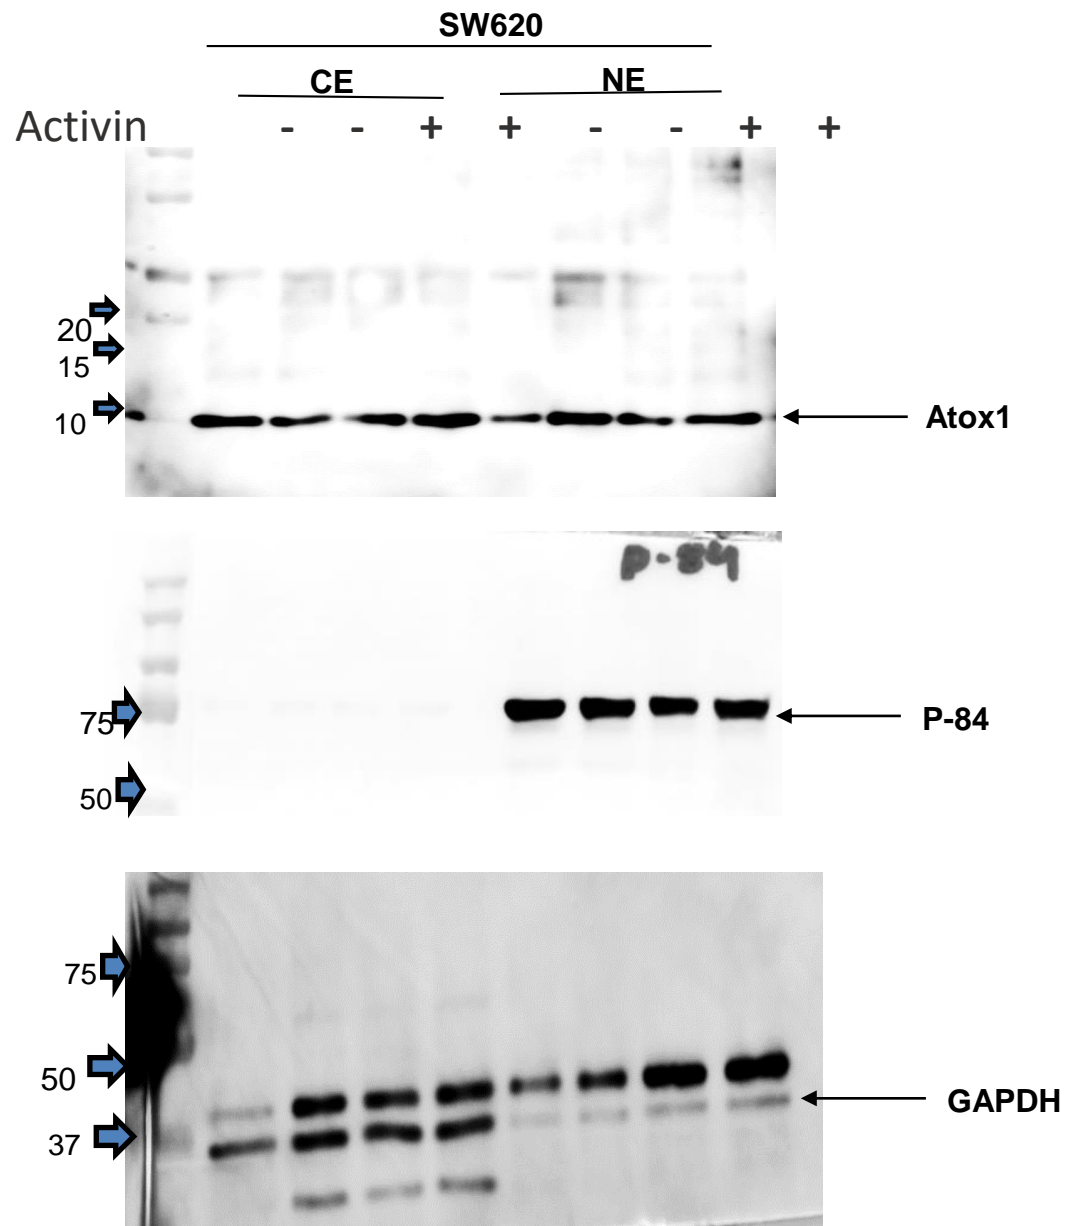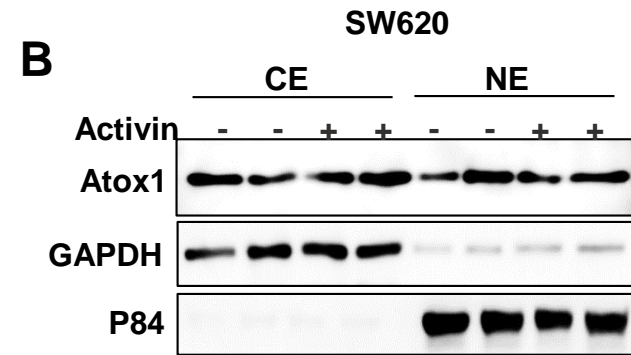

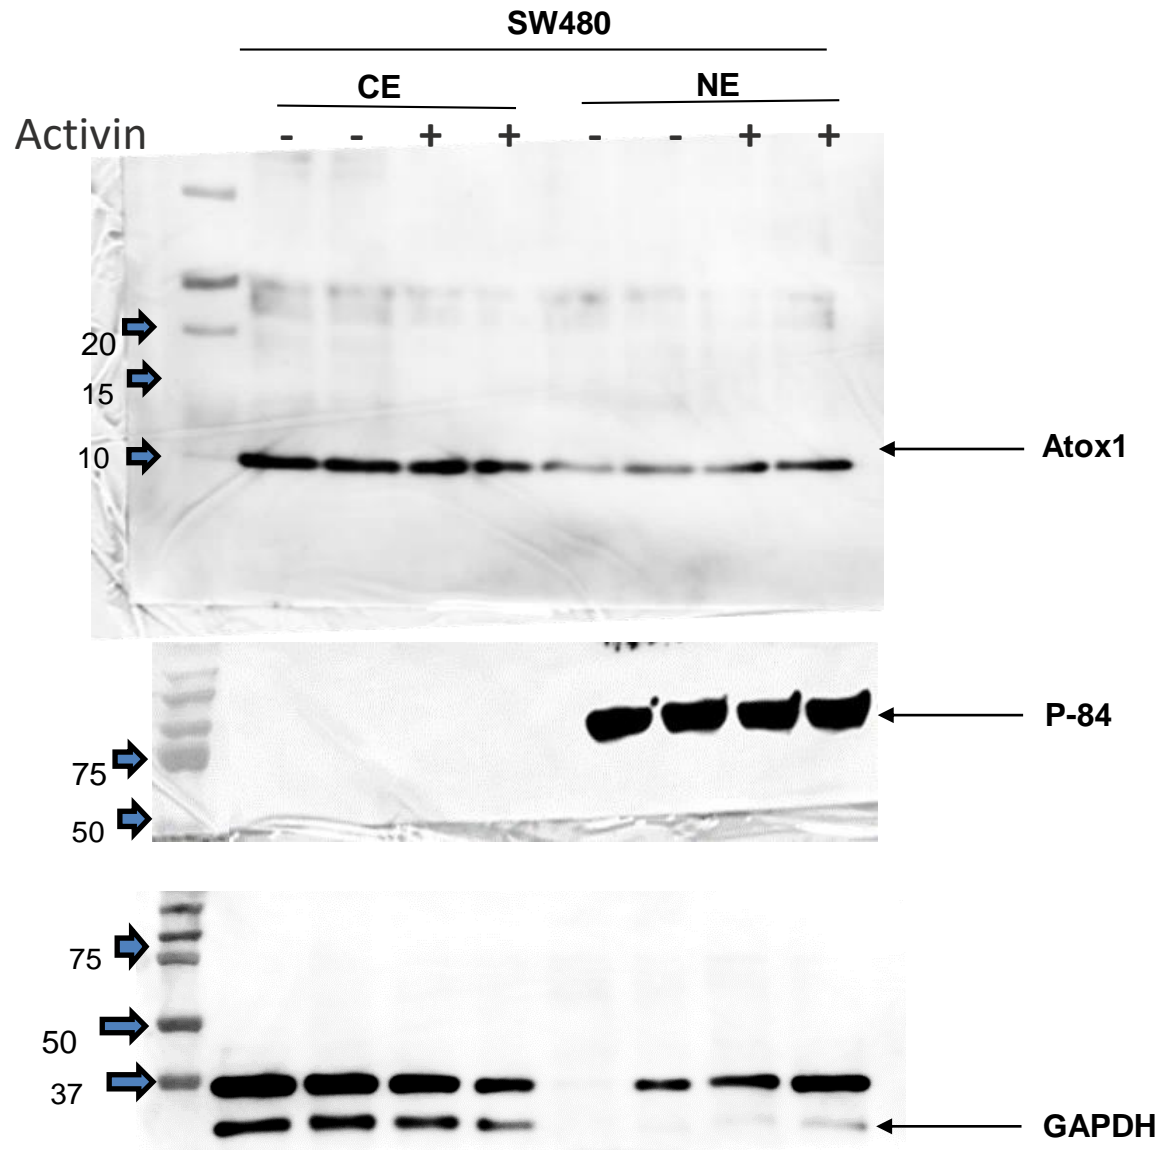

Figure 3A, SW480

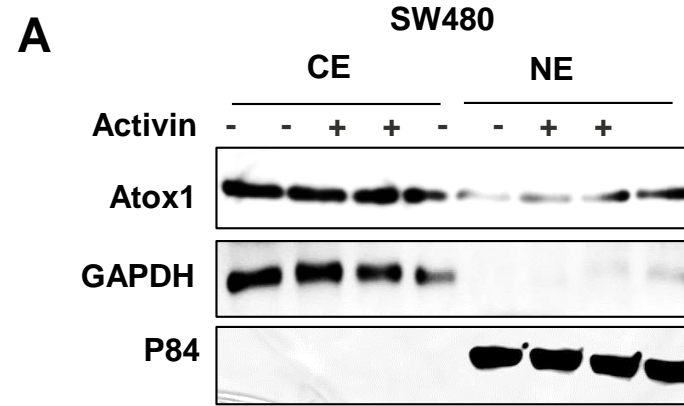

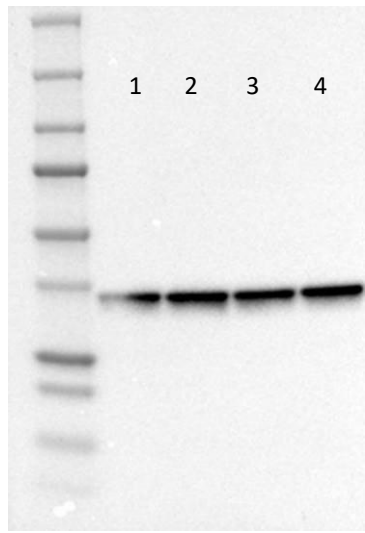

GAPDH

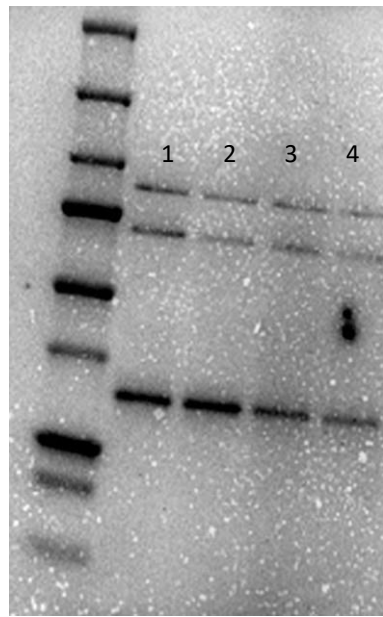

Cyclin D

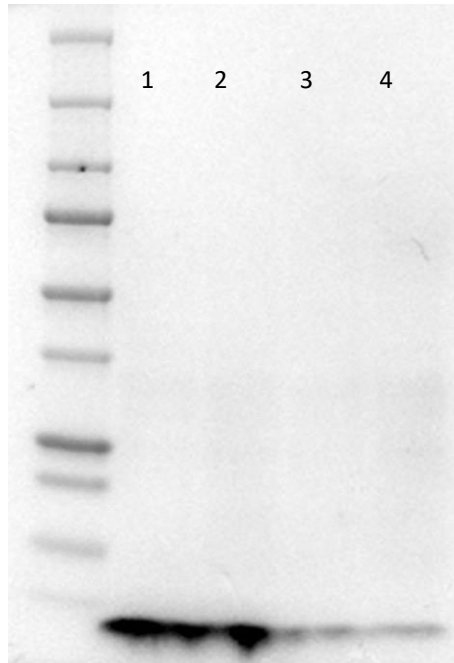

Atox1

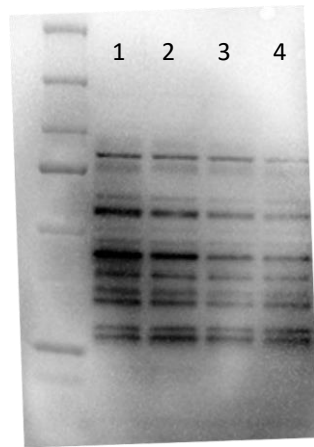

P47 phox

Figure 4

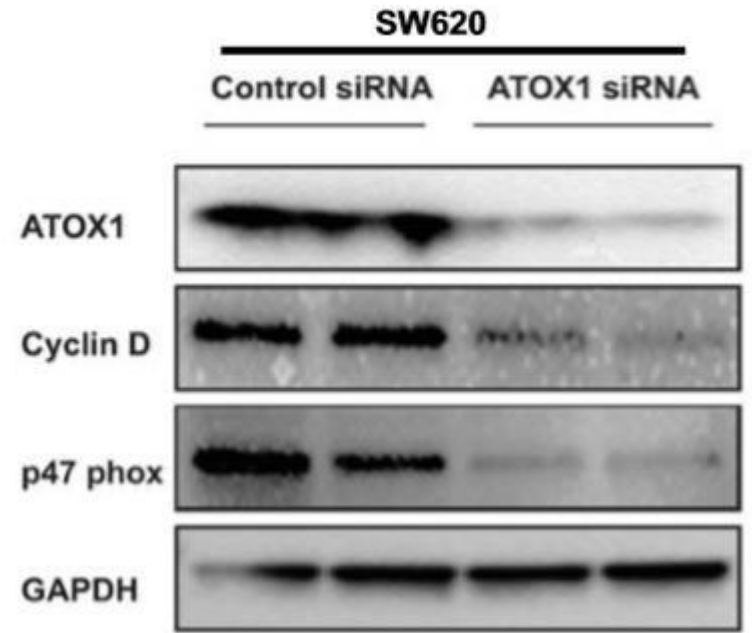

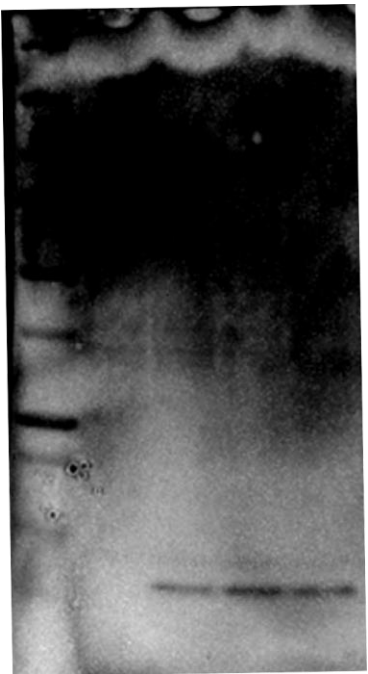

FLAG

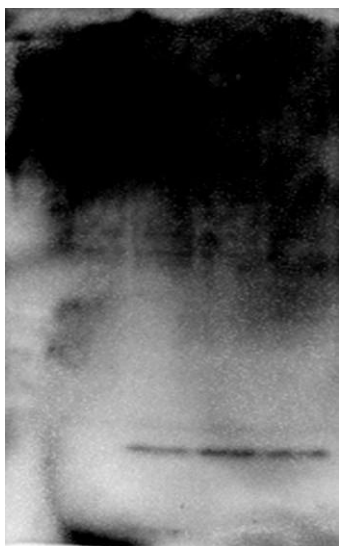

1 2 3 4

FLAG

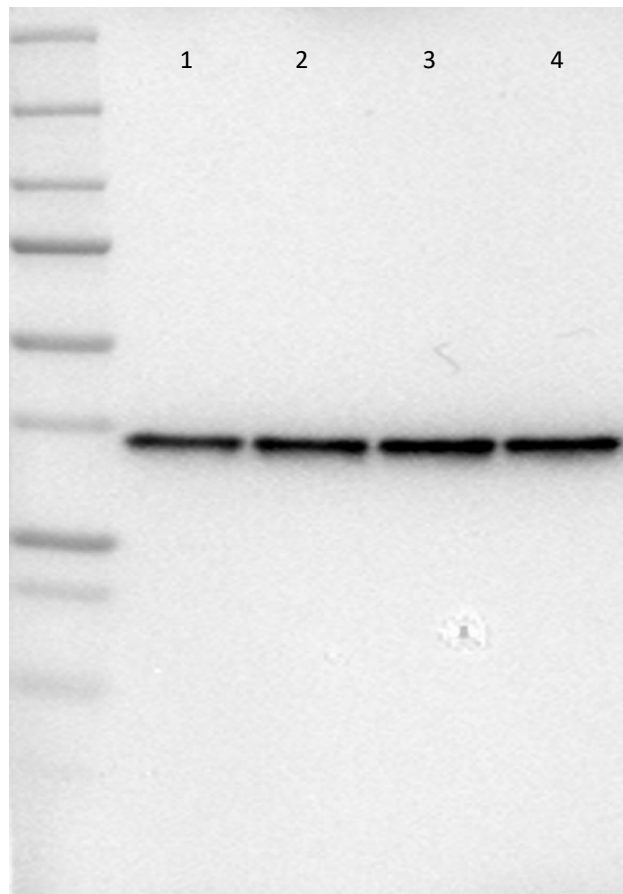

GAPDH

**A**

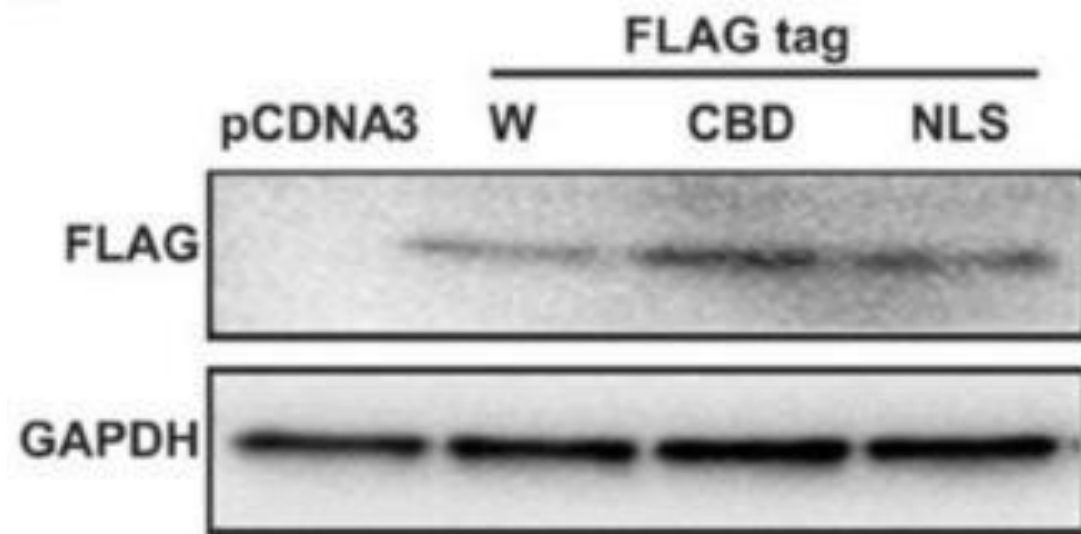

Figure 6
